# Supplementary material
Source: Elsevier journal article supplement (https://www.sciencedirect.com/science/article/pii/S030089322100275X)
Supplement: mmc1 [file S030089322100275X:mmc1.pdf]

## MATERIAL ADICIONAL

### PROTOCOLO DE ESTUDIO DE LA RESONANCIA MAGNÉTICA CARDIACA DE ESTRÉS CON VASODILATADOR

#### **Aspectos técnicos**

Todos los pacientes llegaron remitidos ambulatoriamente desde los centros de salud de nuestra área clínica y se los estudió mediante un escáner de resonancia magnética de 1,5 T (Sonata Magnetom, Siemens, Alemania) según un protocolo previamente definido<sup>1,2</sup>. Todos los estudios se realizaron de manera centralizada; los informaron 2 cardiólogos acreditados por la Sociedad Europea de Cardiología y con más de 10 años de experiencia en el uso y la interpretación de la RMC de estrés. Las imágenes se examinaron con un *software* certificado (Syngo, Siemens, Alemania). En caso de duda o dificultades en la interpretación, ambos operadores valoraron el estudio y los resultados finales fueron adjudicados por consenso.

La vasodilatación se indujo mediante la administración intravenosa de dipiridamol (0,84 mg/kg de peso corporal durante 6 min). Tras la administración de un contraste a base de gadolinio (gadopentetato de dimeglumina o gadobenato de dimeglumina a 0,1 mmol/kg o ácido gadotérico a 0,15 mmol/kg), se adquirieron al menos 3 cortes en el eje corto y 1 corte en el eje largo para valorar la perfusión de primer paso utilizando una secuencia de gradiente-eco (tiempo de inversión, 90 ms; tiempo efectivo de repetición/eco, 182 ms/1 ms; ángulo de inclinación, 12°; matriz, 192 × 96; campo de visión, 400 × 300 mm; grosor del corte, 8 mm).

Las secuencias de realce tardío de gadolinio (RTG) se realizaron 10 min tras la administración del contraste en las mismas localizaciones que en las imágenes de cine, mediante inversión-recuperación segmentada con estado estacionario de precesión libre (tiempo efectivo de repetición/eco, 750 ms/1,26 ms; ángulo de inclinación, 45°; matriz, 256 × 184; campo de visión, 340 × 235 mm; grosor del corte, 7 mm). Se ajustó el tiempo de inversión para anular el miocardio normal. Con

el modelo de 17 segmentos<sup>3</sup>, se definieron visualmente 2 índices de RMC poscontraste:

1. La carga isquémica se definió de manera visual como el número de segmentos que mostraron defecto de perfusión, que se estableció como un retraso persistente en la perfusión miocárdica de primer paso tras la vasodilatación (en al menos 3 imágenes temporales consecutivas en comparación con otros segmentos en el mismo corte). La presencia de defecto de perfusión inducida por el estrés se descartó en los segmentos con RTG transmural y en aquellos que presentaban simultáneamente defecto de perfusión y RTG no transmural, en los que la extensión del defecto de perfusión no excedía claramente la extensión del RTG. Para evitar el aparente defecto de perfusión subendocárdico que puede inducir el paso de gadolinio por el ventrículo izquierdo, se aumentó el tamaño de la matriz de adquisición, lo cual genera un mayor número de frecuencias espaciales que hacen imperceptibles este tipo de artefactos.

2. La extensión del RTG se definió como el número de segmentos que presentaron una señal de intensidad en secuencias de RTG > 2 desviaciones estándar respecto a una zona distante no infartada en más del 50% de la pared miocárdica<sup>4</sup>. Este punto de corte del 50% se demostró previamente como el más útil para predecir la recuperación tardía de la función sistólica<sup>5</sup>.

Por último, en las imágenes de cine se cuantificó la fracción de eyección (%) y los volúmenes indexados telediastólico y telesistólico del ventrículo izquierdo (ml/m<sup>2</sup>). La variabilidad interobservadores e intraobservador para todos los índices de RMC descritos en el presente estudio se ha evaluado antes en esta misma cohorte<sup>6</sup>, y fue < 5%.

## **BIBLIOGRAFÍA**

1. Bodí V, Sanchis J, Lopez-Lereu MP, et al. Prognostic value of dipyridamole stress cardiovascular magnetic resonance imaging in patients with known or suspected coronary artery disease. *J Am Coll Cardiol*. 2007;50:1174-1179.
2. Vincenti G, Masci PG, Monney P, et al. Stress perfusion CMR in patients with known and suspected CAD. *JACC: Cardiovascular Imaging*. 2017;10:526-537.
3. Cerqueira MD, Weissman NJ, et al. Standardized myocardial segmentation and nomenclature for tomographic imaging of the heart: a statement for healthcare professionals from the Cardiac Imaging Committee of the Council on Clinical Cardiology of the American Heart Association. *Circulation*. 2002;105:539-542.
4. Bodí V, Husser O, Sanchis J, et al. Contractile reserve and extent of transmural necrosis in the setting of myocardial stunning: comparison at cardiac MR imaging. *Radiology*. 2010;255:755-763.
5. Kim RJ, Wu E, Rafael A, et al. The use of contrast-enhanced magnetic resonance imaging to identify reversible myocardial dysfunction. *N Engl J Med*. 2000;343:1445-1453.
6. Marcos-Garces V, Gavara J, Monmeneu JV, et al. Vasodilator stress CMR and all-cause mortality in stable ischemic heart disease. *JACC: Cardiovascular Imaging*. 2020;13:1674-1686.

### **Análisis estadístico**

Se probó la distribución normal de los datos con la prueba de Kolmogorov-Smirnov. Los datos continuos de distribución normal se expresaron como media  $\pm$  desviación estándar de la media y se compararon con pruebas de la t de Student para muestras relacionadas y no relacionadas. Los datos no paramétricos se expresaron como la mediana [intervalo intercuartílico] y se compararon mediante la prueba de la U de Mann-Whitney. Los porcentajes grupales se compararon mediante la prueba de la  $\chi^2$  o la prueba exacta de Fisher, según correspondiera. En el análisis univariante, las asociaciones con el tiempo hasta la muerte se evaluaron a través de modelos de regresión de riesgos proporcionales de Cox univariados (tabla 1 del texto principal). La asociación de la carga isquémica (por segmento afectado) con el tiempo hasta la muerte fue se representó con gráficas.

En el análisis multivariable, la asociación de las variables con el tiempo hasta la muerte se evaluó mediante un modelo de regresión de riesgos proporcionales de Cox multivariable en el que se incluyeron como cofactores las variables que habían mostrado asociación con la muerte en el análisis univariado ( $p < 0,1$ , tabla 1 del texto principal). Se calculó la razón de riesgos con el correspondiente intervalo de confianza del 95%. El exceso de colinealidad de las variables empleadas en el modelo multivariado se evaluó utilizando el factor de inflación de la varianza (excesivo si  $> 5$ ). El volumen telesistólico del ventrículo izquierdo se eliminó del análisis debido a la excesiva colinealidad y la correlación ( $> 0,8$ ) con el volumen telediastólico (VTDVI) y la fracción de eyección del ventrículo izquierdo (FEVI). El supuesto de proporcionalidad de riesgos basado en los residuos de Schoenfeld se consideró cumplido con  $p > 0,05$ .

Para minimizar un posible sesgo de selección, el efecto de la revascularización guiada por la resonancia magnética cardiaca (RMC) en la mortalidad total se analizó tanto en todo el grupo de estudio como en una población emparejada 1:1 por puntuación de propensión (pacientes con revascularización guiada por RMC frente pacientes sin revascularización guiada por RMC). Esta puntuación de propensión, destinada a predecir el uso de la revascularización guiada por la RMC, se obtuvo utilizando un modelo que incluía los siguientes cofactores según su valor en el análisis multivariable ( $p < 0,05$ ) y criterios clínicos: edad, varón, diabetes mellitus, FEVI, VTDVI y extensión de la isquemia y del realce tardío de gadolinio (puede consultarse el modelo en la tabla 1 del material adicional). Se utilizó el modelo probit para el emparejamiento con el vecino más próximo 1:1 y sin reemplazo, de tal manera que se identificó a 1 único paciente no tratado por cada paciente tratado. La bondad de la puntuación de propensión se comprobó por un valor  $> 0,80$  de su área bajo la curva *receiver operating characteristic* para predecir una revascularización guiada por RMC.

Para todo el registro, al evaluar el efecto de la revascularización guiada por la RMC en la mortalidad en función de la carga isquémica, el modelo de regresión de riesgos proporcionales de Cox se ajustó por las características clínicas y de RMC asociadas de manera independiente con la mortalidad en el análisis multivariable ( $p < 0,05$  en

la tabla 2 del texto principal: edad, varón, DM, FEVI, VTDVI) y la puntuación de propensión en pacientes sometidos a revascularización relacionada con RMC.

Se consideró significación estadística si  $p < 0,05$ . Se utilizaron los paquetes estadísticos SPSS (versión 15.0, SPSS Inc., Estados Unidos) y STATA (versión 9.0, StataCorp, Estados Unidos).

**Tabla 1 del material adicional**

Características clínicas y de la RMC incluidas en la puntuación de propensión

|                                                                                                                                      | Estadístico C | p   |
|--------------------------------------------------------------------------------------------------------------------------------------|---------------|-----|
| <i>Modelo 1: Variables asociadas con mortalidad por todas las causas</i>                                                             | 0,800         | –   |
| Edad, varón, DM, FEVI, volumen telediastólico del VI y carga isquémica                                                               |               |     |
| <i>Modelo 2: Modelo 1 + variables (aparte de las del modelo 1) asociadas con el empleo de la revascularización guiada por la RMC</i> |               |     |
| <i>Hipercolesterolemia, revascularización previa, descenso del segmento ST y RTG</i>                                                 | 0,806         | 0,4 |
| Modelo final: Modelo 1 + RTG                                                                                                         | 0,806         | –   |

DM: diabetes mellitus; FEVI: fracción de eyección del ventrículo izquierdo; RMC: resonancia magnética cardiaca; RTG: realce tardío de gadolinio; VI: ventrículo izquierdo.

La puntuación de propensión, dirigida a predecir una revascularización guiada por la RMC, se obtuvo mediante un modelo no parsimonioso que incluyó en el modelo 1 los cofactores relacionados de manera independiente con la ocurrencia de muerte por cualquier causa ( $p < 0,05$  en la tabla 2 del texto principal edad; varón, DM, FEVI, volumen telediastólico del VI y carga isquémica). El estadístico C del modelo resultante fue 0,800, lo que indica una buena discriminación. El resto de variables asociadas con la revascularización guiada por la RMC ( $p < 0,05$  en la tabla 3 del texto principal; hipercolesterolemia, revascularización previa, descenso del segmento ST y RTG) también se probaron en el modelo 2. Ninguna de estas variables mejoró significativamente el estadístico C del modelo 1. Sin embargo, la extensión del RTG también sirvió para el emparejamiento con el vecino más próximo 1:1 debido a que es un indicador muy determinante en la práctica clínica para indicar revascularización guiada por RMC.

**Figura 1 del material adicional.** A: diagrama de flujo de pacientes. B: motivos para una RMC de estrés. ECG: electrocardiograma; SCC: síndrome coronario crónico; RMC: resonancia magnética cardiaca.

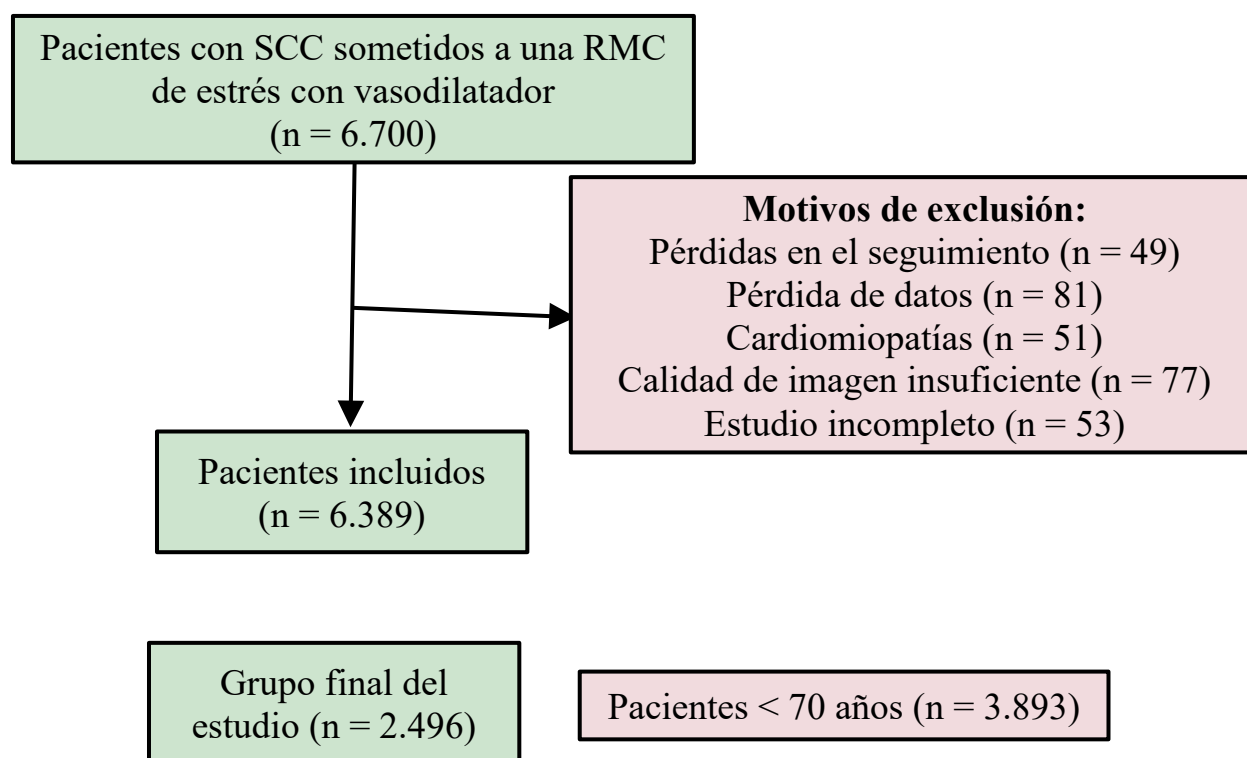

**B**

|                                                | Todos los pacientes<br>(n = 2.496) |
|------------------------------------------------|------------------------------------|
| Ergometría no concluyente                      | 292 (12%)                          |
| Incapacidad de ejercicio                       | 475 (19%)                          |
| ECG basal alterado                             | 26 (1%)                            |
| Evaluación de isquemia y viabilidad miocárdica | 602 (24%)                          |
| Revascularización previa                       | 234 (9%)                           |
| Decisión médica                                | 867 (35%)                          |

**Figura 2 del material adicional Tasas de mortalidad**

**A**

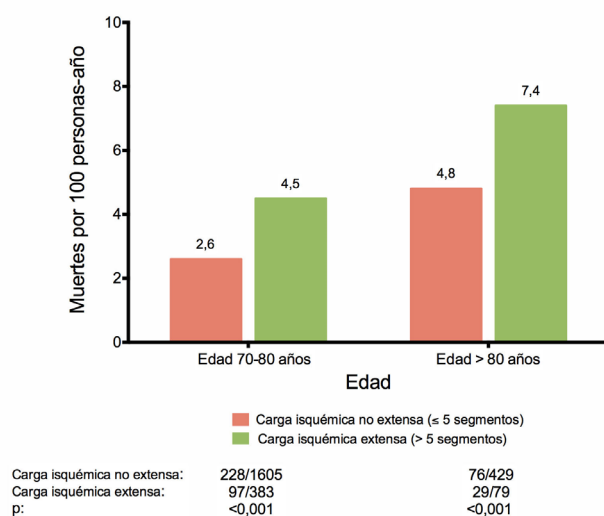

**B**

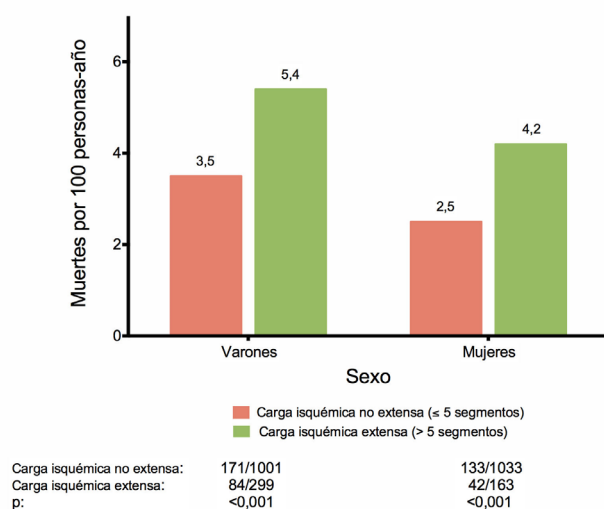

Tasas de mortalidad anualizadas según la edad (A) y el sexo (B) basadas en la extensión de la isquemia.
